# Supplementary material
Source: Springer Nature journal article supplement (https://www.springermedizin.de/resource/supplementary/13017_2008_101_MOESM2_ESM.pdf/9635472)

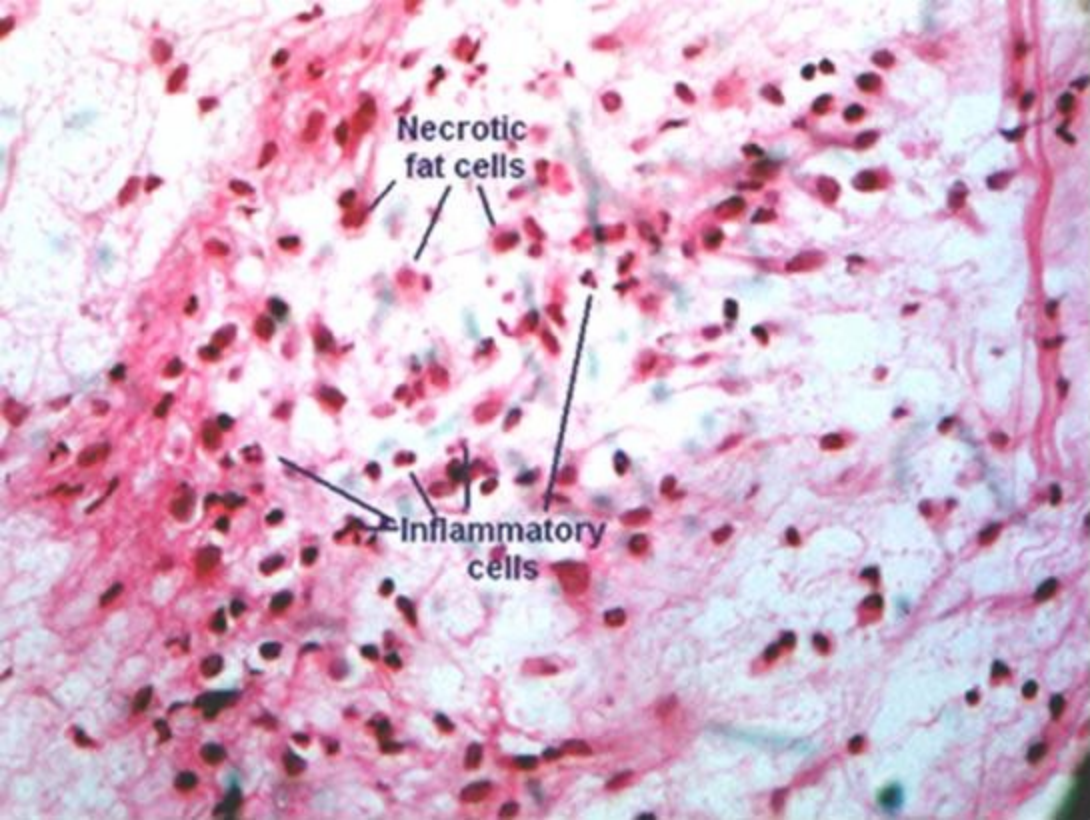

Necrotic  
fat cells

Inflammatory  
cells

Supplement: MOESM2 [file 9635472]
